# Supplementary material for: Monitoring of Heavy Metals and Pesticide Residues of Herbal Decoctions in Traditional Korean Medicine Clinics in Korea
Source: MDPI journal article supplement (doi:10.3390/ijerph19148523), 2022-07-12
Supplement: s1 [file s1]

**Table S1. 10 types of** herbal decoction formulae and compositions from traditional Korean medicine clinics, hospitals, and external herbal dispensaries

|                                                    | Ssanghwa-<br>tang(雙和湯) | Sipjeondaebo-<br>tang(十全大補<br>湯) | Galgeun-<br>tang(葛根湯) | Bojungikgi-<br>tang(補中益<br>氣湯) | Banhasasim-<br>tang(半夏瀉<br>心湯) | Ojeok-san<br>(五積散) | Dangguisu-<br>san<br>(當歸鬚散) | Bangpungto<br>ngseong-san<br>(防風通聖散) | Dokhwalgis<br>aeng-tang<br>(獨活寄生湯) | Kangwhalyu<br>pung-tang<br>(羌活愈風湯) |
|----------------------------------------------------|------------------------|----------------------------------|-----------------------|--------------------------------|--------------------------------|--------------------|-----------------------------|--------------------------------------|------------------------------------|------------------------------------|
| <i>Glycyrrhiza uralensis</i> Fischer (甘草)          | ○                      | ○                                | ○                     | ○                              | ○                              | ○                  | ○                           | ○                                    | ○                                  | ○                                  |
| <i>Angelica gigas</i> Nakai<br>(當歸)                | ○                      | ○                                |                       | ○                              |                                | ○                  | ○                           | ○                                    | ○                                  | ○                                  |
| <i>Paeonia lactiflora</i> Pallas<br>(芍藥)           | ○                      | ○                                | ○                     |                                |                                | ○                  | ○                           | ○                                    | ○                                  |                                    |
| <i>Zingiber officinale</i> Roscoe<br>(乾薑)          | ○                      | ○                                | ○                     | ○                              | ○                              | ○                  |                             |                                      |                                    |                                    |
| <i>Cinnamomum cassia</i> Presl<br>(肉桂)             | ○                      | ○                                | ○                     |                                |                                |                    | ○                           |                                      | ○                                  | ○                                  |
| <i>Panax ginseng</i> C. A. Meyer<br>(人參)           |                        | ○                                |                       | ○                              | ○                              |                    |                             |                                      | ○                                  | ○                                  |
| <i>Cnidium officinale</i> Makino<br>(川芎)           | ○                      |                                  |                       |                                |                                | ○                  |                             | ○                                    | ○                                  | ○                                  |
| <i>Astragalus membranaceus</i> Bunge<br>(黃耆)       | ○                      | ○                                |                       | ○                              |                                |                    |                             |                                      |                                    | ○                                  |
| <i>Ephedra sinica</i> Stapf<br>(麻黃)                |                        |                                  | ○                     |                                |                                | ○                  |                             | ○                                    |                                    | ○                                  |
| <i>Euphorbia pekinensis</i> Ruprecht<br>(大棗)       | ○                      |                                  | ○                     |                                | ○                              | ○                  |                             |                                      |                                    |                                    |
| <i>Zingiber officinale</i> Roscoe<br>(生薑)          |                        |                                  |                       |                                |                                |                    |                             | ○                                    | ○                                  | ○                                  |
| <i>Scutellaria baicalensis</i> Georgi<br>(黃芩)      |                        |                                  |                       |                                | ○                              |                    |                             | ○                                    |                                    | ○                                  |
| <i>Saposhnikovia divaricata</i> Schischkin<br>(防風) |                        |                                  |                       |                                |                                |                    |                             | ○                                    | ○                                  | ○                                  |
| <i>Rehmanniae radix preparata</i><br>(熟地黃)         | ○                      | ○                                |                       |                                |                                |                    |                             |                                      | ○                                  |                                    |



[illegible]

|                                                  |   |
|--------------------------------------------------|---|
| <i>Chrysanthemum indicum</i> Linné               | ○ |
| (甘菊)                                             |   |
| <i>Ostericum koreanum</i> Maximowicz             | ○ |
| (羌活)                                             |   |
| <i>Lycium chinense</i> Miller                    | ○ |
| (枸杞子)                                            |   |
| <i>Vitex rotundifolia</i> Linné fil              | ○ |
| (蔓荆子)                                            |   |
| <i>Paeonia lactiflora</i> Pallas                 | ○ |
| (白芍藥)                                            |   |
| <i>Rehmannia glutinosa</i> (Gaertner)            |   |
| <i>Liboschitz ex Steudel</i>                     | ○ |
| (生地黄)                                            |   |
| <i>Citrus aurantium</i> Linné                    | ○ |
| (枳殼)                                             |   |
| <i>Lycium chinense</i> Miller                    | ○ |
| (地骨皮)                                            |   |
| <i>Anemarrhena asphodeloides</i> Bunge           | ○ |
| (知母)                                             |   |
| ○ : The herb is included in the herbal decoction |   |
